# Supplementary material for: Meningiomas and Cognitive Impairment after Treatment: A Systematic and Narrative Review
Source: PubMed Central journal article supplement (PMC8070481; doi:10.3390/cancers13081846), 2021-04-13
Supplement: cancers-13-01846-s001.pdf [file cancers-13-01846-s001.pdf]

| Author, year, design                   | Sample size (n) | Gender       | Mean age (y ± SD, range) | Mean education (y ± SD or level) | Location                                                                | Assessment measurement tools             | Cognition dimensions tested                                                           | • Difference between pre- and post-op or against control group                                                                                                                                                        | Follow-up (y) |
|----------------------------------------|-----------------|--------------|--------------------------|----------------------------------|-------------------------------------------------------------------------|------------------------------------------|---------------------------------------------------------------------------------------|-----------------------------------------------------------------------------------------------------------------------------------------------------------------------------------------------------------------------|---------------|
| Van Lonkhuizen, 2019, prospective      | 242             | 168 F & 74 M | 57.2 (23-82)             | 5th level                        | 101 Left & 113 Right // 142 Frontal & 100 Non-frontal                   | Central Nervous System Vital Signs tests | Verbal and visual memory, reaction time, complex attention and cognitive flexibility  | <ul style="list-style-type: none"> <li>Worsening of SCF, anxiety and depression before and at 1y (p &lt; 0.01) with surgery</li> <li>No difference after surgery</li> </ul>                                           | 1             |
| Rijnen, 2019, prospective              | 261             | 189 F & 72 M | 57.8 ± 11.7 (23-82)      | 14.0 ± 3.7                       | 106 Left, 124 Right and 31 Bilateral // 154 Frontal and 107 Non-frontal | Central Nervous System Vital Signs tests | Verbal and visual memory, reaction time, complex attention and cognitive flexibility  | <ul style="list-style-type: none"> <li>Worsening of verbal memory, visual memory, processing speed, psychomotor speed, reaction time, attention complex and cognitive flexibility with surgery (p&lt;0.05)</li> </ul> | 1             |
| Van Nieuwenhuizen, 2019, retrospective | 21              | 14 F & 7 M   | 55.3 (10.6)              | 4.0 (1.8) level                  | 13 Convexity, 5 Skull base & 3 Orbital                                  | Central Nervous System Vital Signs tests | Verbal and working memory, attention, executive functioning and cognitive flexibility | <ul style="list-style-type: none"> <li>Significant correlation between preoperative cerebral edema and tumor volume and postoperative cognitive functioning</li> </ul>                                                | 0.4           |
| Pranckevičienė, 2019, prospective      | 93              | 68 F & 25 M  | 63.8 +/- 10.7            | n.a                              | 36 Left, 37 Right and 20 Bilateral                                      | HVLT-R, EORTC, QLQ-30 and QLQ-BN20       | Verbal, working and visual memory and complex attention                               | <ul style="list-style-type: none"> <li>Worsening of Working memory, Delayed recall and recognition, Flatter learning slope and less effective acquisition compared to control group</li> </ul>                        | n.a           |
| Van Nieuwenhuizen, 2018, retrospective | 20              | 14 F & 6 M   | 51.4 (10.9)              | 4 (6) level                      | 12 Frontal, 4 Parietal, 2 Temporal and 2 Occipital                      | Central Nervous System Vital Signs tests | Verbal and working memory, attention and executive functioning                        | <ul style="list-style-type: none"> <li>None</li> </ul>                                                                                                                                                                | n.a           |

|                                         |    |             |             |            |                                                                      |                                                                                       |                                                                                                                    |                                                                                                                                                                                              |      |
|-----------------------------------------|----|-------------|-------------|------------|----------------------------------------------------------------------|---------------------------------------------------------------------------------------|--------------------------------------------------------------------------------------------------------------------|----------------------------------------------------------------------------------------------------------------------------------------------------------------------------------------------|------|
| <b>Di Cristofori, 2018, prospective</b> | 41 | 15 F & 26 M | 74 (70–87)  | n.a        | 7 Skull base, 9 Falx cerebri, 7 Posterior fossa and 18 Convexity     | Raven Matrices, Objects and Verbs naming, ideomotor apraxia, Token Test, among others | Verbal and working memory, attention, executive functioning, language                                              | <ul style="list-style-type: none"> <li>Improvement in Language, memory, attention, executive verbal functions, executive non-verbal functions and praxis with surgery (p&lt;0.01)</li> </ul> | 1    |
| <b>Zweckberger, 2017, prospective</b>   | 58 | 47 F & 11 M | 56.4 ± 12.5 | n.a        | 46 Anterior skull base, 5 Middle and 7 Posterior fossa               | HVLT-R, EORTC, QLQ-30 and QLQ-BN20                                                    | Verbal, working and visual memory, attention, executive functioning, language                                      | <ul style="list-style-type: none"> <li>Improvement of Verbal learning, visual learning memory, Visuomotor processing speed and working memory (p&lt;0.05) with surgery</li> </ul>            | 1    |
| <b>Hendrix, 2017, prospective</b>       | 12 | 7 F & 5 M   | 62.0 ± 13.2 | n.a        | 1 Left, 5 Right and 6 Bilateral                                      | Central Nervous System Vital Signs tests                                              | Verbal and working memory, attention, executive functioning, language                                              | <ul style="list-style-type: none"> <li>Worsening of Verbal fluency and Perceptual speed compared to control group</li> </ul>                                                                 | 0.17 |
| <b>Abel, 2016, retrospective</b>        | 70 | 45 F & 25 M | 62.1 ± 12.6 | 13.5 ± 2.5 | 23 ventromedial & 47 non-ventromedial prefrontal cortex              | Others                                                                                | Verbal and visual memory, attention and orientation, executive functioning, language skills, cognitive flexibility | <ul style="list-style-type: none"> <li>Worsening of behavior and specifically adaptive functions with surgery</li> </ul>                                                                     | n.a  |
| <b>Liouta, 2016, prospective</b>        | 54 | 38 F & 16 M | 56.8 ± 12.8 | 10.2 ± 2.4 | 17 Left, 27 Right and 10 Bilateral // 28 Convexity and 26 Skull base | Wechsler Adult Intelligence Scale-III Digit Span, TMT Parts A and B,                  | Memory, executive functioning, language and cognitive flexibility                                                  | <ul style="list-style-type: none"> <li>Verbal deficits more pronounced in the left than right hemisphere</li> <li>No deterioration in neurocognitive function after surgery</li> </ul>       | 1    |

|                                            |     |              |                 |                  |                                                                   | COWAT,<br>RBMT                           |                                                                                                 |                                                                                                                                                                                                                |            |
|--------------------------------------------|-----|--------------|-----------------|------------------|-------------------------------------------------------------------|------------------------------------------|-------------------------------------------------------------------------------------------------|----------------------------------------------------------------------------------------------------------------------------------------------------------------------------------------------------------------|------------|
| <b>Bommakanti, 2016, prospective</b>       | 57  | 35 F & 22 M  | 44.72 (17-64)   | n.a              | 20 Left, 20 Right and 17 Bilateral                                | Others                                   | Verbal, working and visual memory, attention and executive functioning                          | <ul style="list-style-type: none"> <li>Worst Memory, attention and executive functions (p: n.a) compared to control group</li> </ul>                                                                           | 0.25       |
| <b>Campanella, 2015, prospective</b>       | 16  | n.a          | 57.94 ± 11.08   | 10.81 ± 4.02     | 9 Left & 7 Right; 6 Frontal, 8 Parietal and 2 Temporal            | Central Nervous System Vital Signs tests | Attention and orientation, executive functioning, language and perception.                      | <ul style="list-style-type: none"> <li>Worsening of Alexithymia and Self-maturity with the surgery</li> </ul>                                                                                                  | 0.33       |
| <b>Meskal, 2015, prospective</b>           | 68  | 46 F & 22 M  | 55.66 (36-74)   | 4.90 (4-7) level | 30 Left, 33 Right and 5 Bilateral; 39 Frontal & 29 Non-frontal    | Central Nervous System Vital Signs tests | Memory, attention, processing speed, executive functioning and cognitive flexibility,           | <ul style="list-style-type: none"> <li>Improvement memory, complex attention, cognitive flexibility, processing speed, and executive functioning (p &lt; 0.05) with the surgery</li> </ul>                     | 0.25       |
| <b>van der Vossen, 2014, retrospective</b> | 136 | 106 F & 30 M | 59.1 ± 12.7     | n.a              | 66 Convexity and 70 Non-convexity                                 | CFQ and HADS                             | Cognitive flexibility, anxiety and depression                                                   | <ul style="list-style-type: none"> <li>Worsening of cognitive and/or emotional problems in 40% of patients with surgery</li> </ul>                                                                             | 3.0 ± 0.9  |
| <b>Waagemans, 2011, retrospective</b>      | 89  | 66 F & 23 M  | 58.4 ± 13.2     | 3.8 (2.1) level  | 37 Left, 25 Right & 27 Bilateral; 45 Convexity & 44 Non-convexity | Others                                   | Working and verbal memory, attention, executive functioning, language and cognitive flexibility | <ul style="list-style-type: none"> <li>Worsening of executive functioning, psychomotor speed, verbal and working memory and information processing capacity (p &lt; 0.05) compared to control group</li> </ul> | 1          |
| <b>Krupp, 2009, retrospective</b>          | 91  | 60 F & 31 M  | 56 ± 10 (31-75) | n.a              | 48 Left & 43 Right; 40 Frontal & 51 Non-frontal                   | Others                                   | Language and cognitive flexibility                                                              | <ul style="list-style-type: none"> <li>Worsening of concentration performance, verbal knowledge, technical ability and word fluency compared to control group</li> </ul>                                       | 1.25 ± 0.3 |

|                                               |    |             |             |           |                                                               |                                          |                                                                                                               |                                                                                                                                                                                                                  |             |
|-----------------------------------------------|----|-------------|-------------|-----------|---------------------------------------------------------------|------------------------------------------|---------------------------------------------------------------------------------------------------------------|------------------------------------------------------------------------------------------------------------------------------------------------------------------------------------------------------------------|-------------|
| <b>Dijkstra, 2009, retrospective</b>          | 89 | 66 F & 23 M | 58.6 ± 12.1 | 3.8 ± 2.2 | 37 Left, 25 Right and 27 Bilateral                            | Others                                   | Executive functioning, Psychomotor speed, Working memory, Attention, Information processing and Verbal memory | <ul style="list-style-type: none"> <li>Worsening of executive functioning, verbal memory, information processing capacity, psychomotor speed and working memory (p&lt;0.05) compared to control group</li> </ul> | 1           |
| <b>Yoshii, 2008, retrospective</b>            | 9  | n.a         | 61.8        | n.a       | 4 Left and 5 Right                                            | Central Nervous System Vital Signs tests | Language, attention, executive functioning, memory, and perception                                            | <ul style="list-style-type: none"> <li>Worsening of working memory in left side compared to control group</li> </ul>                                                                                             | n.a         |
| <b>Van Nieuwenhuizen, 2007, retrospective</b> | 18 | 15 F & 3 M  | 62.6 ± 11.8 | n.a       | n.a                                                           | HVLT-R, EORTC, QLQ-30 and QLQ-BN20       | Verbal, working and visual memo, complex attention and language                                               | <ul style="list-style-type: none"> <li>Worsening of memory compared to control group (p &lt; 0.05)</li> </ul>                                                                                                    | 1           |
| <b>Steinvorth, 2003, prospective</b>          | 40 | 27 F & 13 M | 55 ± 14     | n.a       | 13 Left, 22 Right and 2 Bilateral                             | Others                                   | Memory and attention                                                                                          | <ul style="list-style-type: none"> <li>Improvement of attention and memory functions with radiotherapy</li> </ul>                                                                                                | 1           |
| <b>Tucha, 2003, prospective</b>               | 54 | 37 F & 17 M | 57.8 ± 1.5  | 9.6 ± 0.2 | 22 Left, 21 Right and 11 Bilateral                            | Central Nervous System Vital Signs tests | Verbal and visual memory, psychomotor speed, reaction time, complex attention and cognitive flexibility       | <ul style="list-style-type: none"> <li>Worsening of working memory and improvement of attentional functions with surgery</li> </ul>                                                                              | 0-33 - 0-75 |
| <b>Tucha, 2001, prospective</b>               | 33 | 21 F & 12 M | 72.8 ± 0.9  | n.a       | 14 Left, 13 Right & 6 Bilateral; 10 Frontal & 20 Non-frontals | Central Nervous System Vital Signs tests | verbal and visual memory, complex attention, language and cognitive flexibility                               | <ul style="list-style-type: none"> <li>Improvement of attention and memory functions with surgery</li> <li>Worsening of verbal and figural working memory compared to control group</li> </ul>                   | 0.21 - 0.41 |

**Supplementary Table.** Detailed description of each cohort (study and patient characteristics). COWAT (Controlled Oral Word Association Test); F (females),

M (males); n.a. (not acknowledged); RBMT (Rivermead Behavioural Memory Test); SD (standard deviation); TMT (Trail making Test); y(years).
